# Supplementary material for: A label-free detection of diethylstilbestrol based on molecularly imprinted polymer-coated upconversion nanoparticles obtained by surface grafting
Source: Royal Society of Chemistry journal article supplement (doi:10.1039/c6ra26999k), 2017-01-01
Supplement: c6ra26999k1.pdf [file c6ra26999k1.pdf]

## Supporting Information

### **A label-free detection of diethylstilbestrol based on surface-graft molecularly imprinted polymers-coated upconversion nanoparticles**

Yu Wang,<sup>a</sup> Shuyue Ren,<sup>a</sup> Huicong Jiang,<sup>a, b</sup> Yuan Peng,<sup>a</sup> Jialei Bai,<sup>a</sup> Qiaofeng Li,<sup>a, b</sup>  
Chao Li,<sup>a</sup> Zhixian Gao\*<sup>a</sup> and Baoan Ning\*<sup>a</sup>

a.Key Laboratory of Risk Assessment and Control Technology for Environment and Food Safety, TianJin Institute of Health and Environment Medicine, TianJin 300050,China;

b.School of Public Health, Zhengzhou University, HeNan 450001,China.

Corresponding author: Zhixian Gao  
E-mail: gaozhx@163.com

Corresponding author: Baoan Ning  
E-mail: ningba@163.com

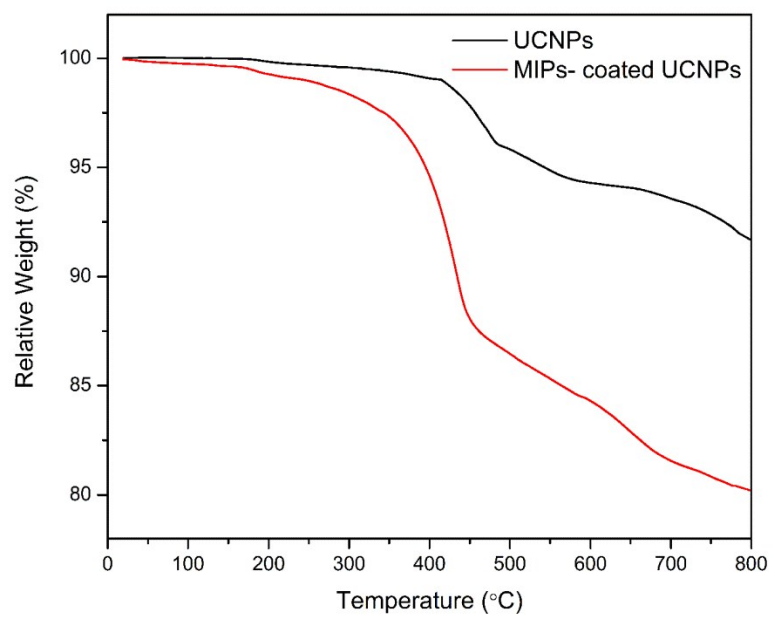

**Fig. S1†.** TGA curves of UCNPs and MIPs-coated UCNPs.

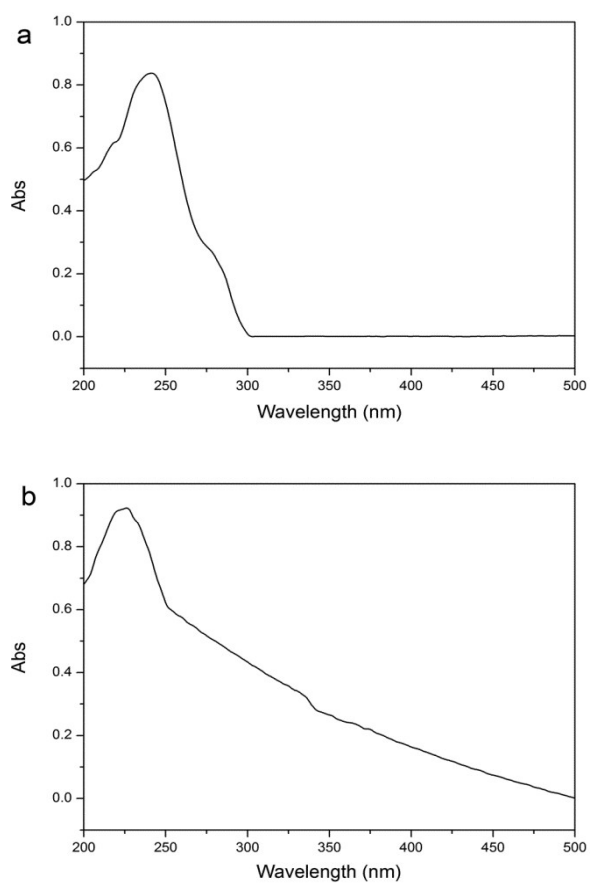

**Fig. S2†.** The UV absorption spectra of DES (a) and UCNPs (b) in acetonitrile.

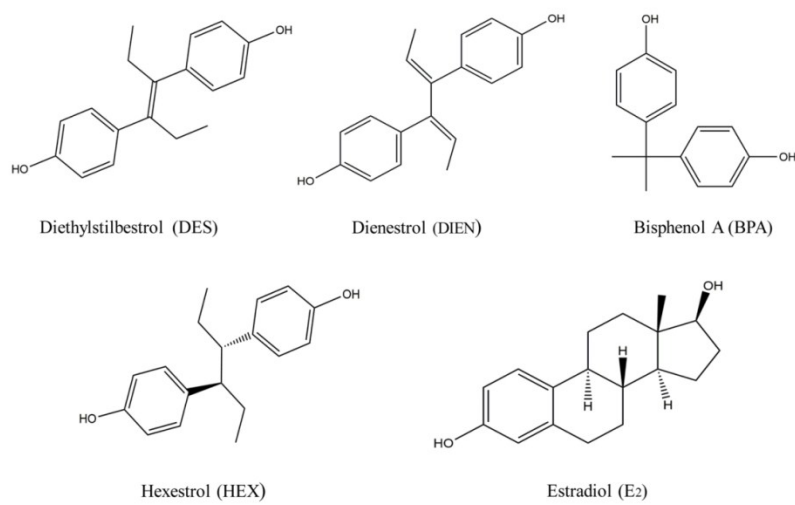

**Fig. S3†.** Chemical structures of five analogues.

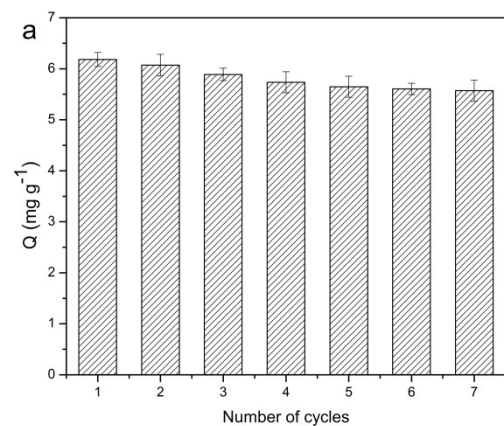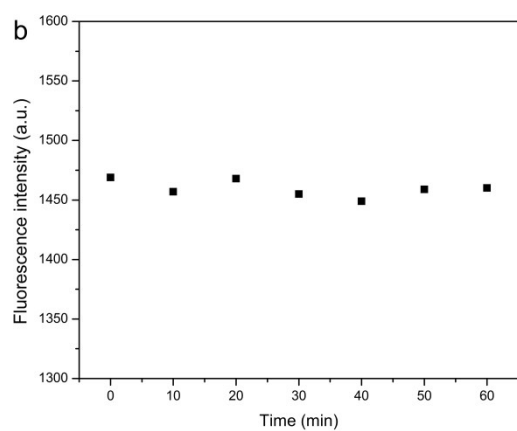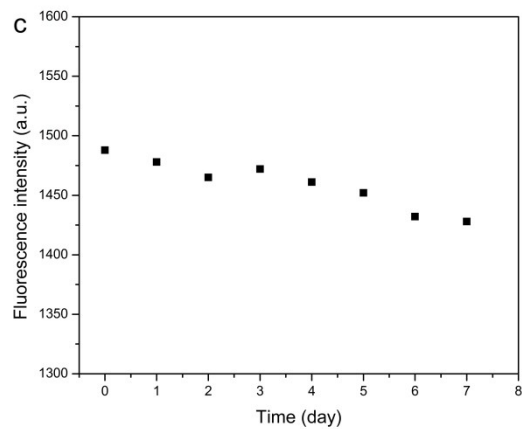

**Fig. S4†.** (a) Reusability of MIPs-coated UCNPs for DES adsorption, (b) Fluorescence intensity of 0.5 mg mL<sup>-1</sup> MIPs-coated UCNPs solution within 60 min. (c) Fluorescence intensity change of MIPs-coated UCNPs solution within 7 days.

**Table S1†**

The effects of identification of the peak of the IR spectra

| Categories | Wavenumber (cm-1) | Functional group   | Meaning                 |
|------------|-------------------|--------------------|-------------------------|
| a          | 1703              | C=O                | the oleic acid molecule |
|            | 2926,2856         | -CH <sub>2</sub> - |                         |
|            | 1090, 808, 942    | Si-O               | the silica shell        |
| b          | 1716              | C=O                | MPS                     |
|            | 1636              | C=C                |                         |
|            | 2925              | -CH <sub>2</sub> - | EGDMA                   |
| c          | 2955              | CH <sub>3</sub> -  |                         |
|            | 1722              | C=O                | a layer of MIP shell    |
|            | 1163              | C-O-C              |                         |

**Table S2†**

Comparison between this method and other methods in literatures.

| Methods                              | Linear range<br>(ng ml <sup>-1</sup> ) | LODs<br>(ng ml <sup>-1</sup> ) | Repeatability | Measure<br>process | Ref.      |
|--------------------------------------|----------------------------------------|--------------------------------|---------------|--------------------|-----------|
| MIFSNCs                              | 100-700                                | -                              | No            | Complex            | [34]      |
| NIR FL probe Cy-DES                  | 268-2147                               | 53.7                           | -             | Complex            | [35]      |
| MIP-HFT                              | 7.5-200                                | 2.5                            | -             | Complex            | [36]      |
| Bi <sub>2</sub> WO <sub>6</sub> -CPE | 13-616                                 | 4.1                            | No            | Complex            | [37]      |
| CCBPE                                | 4.2-125                                | 2.2                            | No            | Complex            | [38]      |
| GCE                                  | 536.7-26836                            | 21.5                           | No            | Complex            | [39]      |
| MIP-coated UCNPs                     | 50-1000                                | 12.8                           | Yes           | Simple             | This work |

## References

- 34 Y. Kim, J.B. Jeon, J.Y. Chang, *Mater Lett*, **2016**, 182, 235-239.
- 35 K. Yin, F. Yu, D. Liu, Z. Xie, L. Chen, *Sensors Actuators B: Chem*, **2016**, 223, 799-805.
- 36 M. Liu, M. Li, B. Qiu, X. Chen, G. Chen, *Anal Chim Acta*, **2010**, 663, 33-38.
- 37 L. Peng, S. Dong, H. Xie, G. Gu, Z. He, J. Lu, T. L. Huang, *J Electroanal Chem*, **2014**, 726, 15-20.
- 38 K. M. Qu, X. Z. Zhang, Z. L. Lv, M. Li, Z. G. Cui, Y. Zhang, B. J. Chen, S. S. Ma, Q. Kong, *Int J Electrochem Sc*, **2012**, 7, 1827-1839.
- 39 Q. Bin, W. Wei, Y. Chi, G. Chen, *Anal Biochem*, **2005**, 336, 196-201.
